# Supplementary material for: Association of Bariatric Surgery With Vascular Outcomes
Source: PubMed Central journal article supplement (PMC8276087; doi:10.1001/jamanetworkopen.2021.15267), 2021-07-12
Supplement: jamanetwopen-e2115267-s001.pdf [file jamanetwopen-e2115267-s001.pdf]

## Supplemental Online Content

Gokce N, Karki S, Dobyys A, et al. Association of bariatric surgery with vascular outcomes. *JAMA Netw Open*. 2021;4(7):e2115267. doi:10.1001/jamanetworkopen.2021.15267

**eTable 1.** Clinical Characteristics Stratified by Sex

**eTable 2.** Clinical Characteristics Stratified by Race

**eTable 3.** Clinical Characteristics of Participants With Metabolically Unhealthy Obesity (MUHO) vs Metabolically Healthy Obesity (MHO)

**eTable 4.** Clinical Characteristics of Participants With Metabolically Unhealthy Obesity (MUHO) vs Metabolically Healthy Obesity (MHO) and High-Sensitivity C-Reactive Protein (hs-CRP) Levels Greater Than 2 mg/dL

This supplemental material has been provided by the authors to give readers additional information about their work.

**eTable 1. Clinical Characteristics Stratified by Sex**

| <b>Clinical Parameter</b>                | <b>Men<br/>(n=60)</b> | <b>Women<br/>(n=246)</b> | <b>P Value</b> |
|------------------------------------------|-----------------------|--------------------------|----------------|
| <b>Age, y</b>                            | 48 (11)               | 41 (12)                  | <0.001         |
| <b>Body Mass Index, kg/m<sup>2</sup></b> | 46 (8)                | 46 (8)                   | 0.786          |
| <b>Waist circumference, cm</b>           | 135 (16)              | 123 (17)                 | <0.001         |
| <b>Weight, kg</b>                        | 144 (25)              | 122 (24)                 | <0.001         |
| <b>Glucose, mg/dl</b>                    | 114 (47)              | 111 (52)                 | 0.649          |
| <b>Insulin, <math>\mu</math>U/ml</b>     | 17 (8)                | 15 (8)                   | 0.154          |
| <b>HOMA-IR</b>                           | 6 (8)                 | 5 (6)                    | 0.325          |
| <b>Triglycerides, mg/dl</b>              | 130 (81)              | 119 (66)                 | 0.341          |
| <b>Total Cholesterol, mg/dl</b>          | 179 (43)              | 185 (40)                 | 0.380          |
| <b>HDL-C, mg/dl</b>                      | 41 (8)                | 49 (13)                  | <0.001         |
| <b>LDL-C, mg/dl</b>                      | 112 (34)              | 112 (33)                 | 0.922          |
| <b>HbA1C, %</b>                          | 6.2 (1.4)             | 6.2 (1.7)                | 0.785          |
| <b>hs-C Reactive Protein, mg/dl</b>      | 9.2 (13.3)            | 9.9 (8.7)                | 0.725          |
| <b>Flow mediated dilation, %</b>         | 5.8 (3.3)             | 10.1 (5.3)               | <0.001         |
| <b>Reactive Hyperemia, % change</b>      | 761 (344)             | 752 (413)                | 0.891          |

Descriptive statistics that are normally distributed are presented as mean with standard deviation (SD), and non-normally distributed data are presented as medians with interquartile ranges (IQRs). Abbreviations: HOMA-IR: Homeostatic Model Assessment of Insulin Resistance; HDL-C: High-density lipoprotein cholesterol; LDL-C: Low-density lipoprotein cholesterol; HbA1C: Hemoglobin A1C.

**eTable 2. Clinical Characteristics Stratified by Race**

| Clinical Parameter                 | White<br>(n=199) | Black or other race<br>(n=108) | P value |
|------------------------------------|------------------|--------------------------------|---------|
| Female, %                          | 77               | 86                             | 0.063   |
| Age, y                             | 44 (12)          | 40 (11)                        | 0.006   |
| Body Mass Index, kg/m <sup>2</sup> | 46 (8)           | 45 (7)                         | 0.356   |
| Waist circumference, cm            | 127 (18)         | 121 (16)                       | 0.009   |
| Weight, kg                         | 127 (27)         | 124 (23)                       | 0.306   |
| Glucose, mg/dl                     | 111 (46)         | 112 (59)                       | 0.857   |
| Insulin, $\mu$ U/ml                | 16 (8)           | 15 (8)                         | 0.724   |
| HOMA-IR                            | 5 (7)            | 6 (7)                          | 0.857   |
| Triglycerides, mg/dl               | 129 (65)         | 106 (75)                       | 0.006   |
| Total Cholesterol, mg/dl           | 187 (42)         | 176 (37)                       | 0.022   |
| HDL-C, mg/dl                       | 47 (13)          | 47 (12)                        | 0.851   |
| LDL-C, mg/dl                       | 115 (35)         | 106 (29)                       | 0.010   |
| HbA1C, %                           | 6.1 (1.4)        | 6.3 (1.9)                      | 0.265   |
| hs-C Reactive Protein, mg/dl       | 9.6 (10.3)       | 10.5 (9.0)                     | 0.485   |
| Flow mediated dilation, %          | 8.7 (4.9)        | 10.3 (5.6)                     | 0.014   |
| Reactive Hyperemia, % change       | 739 (378)        | 789 (440)                      | 0.368   |

Descriptive statistics that are normally distributed are presented as mean with standard deviation (SD), and non-normally distributed data are presented as medians with interquartile ranges (IQRs). Abbreviations: HOMA-IR: Homeostatic Model Assessment of Insulin Resistance; HDL-C: High-density lipoprotein cholesterol; LDL-C: Low-density lipoprotein cholesterol; HbA1C: Hemoglobin A1C.

**eTable 3. Clinical Characteristics of Participants With Metabolically Unhealthy Obesity (MUHO) vs Metabolically Healthy Obesity (MHO)**

| Clinical Parameter                 | MUHO<br>(n=222) | MHO<br>(n=78) | P value |
|------------------------------------|-----------------|---------------|---------|
| Female, %                          | 77              | 88            | 0.023   |
| Age, y                             | 45 (12)         | 37 (11)       | <0.001  |
| Body Mass Index, kg/m <sup>2</sup> | 46 (8)          | 45 (6)        | 0.629   |
| Waist circumference, cm            | 127 (17)        | 119 (17)      | 0.001   |
| Weight, kg                         | 126 (26)        | 123 (22)      | 0.254   |
| Glucose, mg/dl                     | 120 (57)        | 89 (10)       | <0.001  |
| Insulin, $\mu$ IU/ml               | 16 (8)          | 13 (7)        | <0.001  |
| HOMA                               | 6.4 (7.6)       | 2.8 (1.5)     | <0.001  |
| Triglycerides, mg/dl               | 131 (76)        | 91 (33)       | <0.001  |
| Total Cholesterol, mg/dl           | 182 (42)        | 186 (35)      | 0.488   |
| HDL-C, mg/dl                       | 46 (13)         | 51 (12)       | 0.003   |
| LDL-C, mg/dl                       | 110 (33)        | 117 (31)      | 0.134   |
| HbA1C, %                           | 6.5 (1.8)       | 5.3 (0.4)     | <0.001  |
| hs-C Reactive Protein, mg/dl       | 10 (10)         | 10 (9)        | 0.818   |
| Flow mediated dilation, %          | 8.4 (5.1)       | 11.9 (4.9)    | <0.001  |
| Reactive Hyperemia, % change       | 695 (373)       | 927 (431)     | <0.001  |

Descriptive statistics that are normally distributed are presented as mean with standard deviation (SD), and non-normally distributed data are presented as medians with interquartile ranges (IQRs). Abbreviations: MUHO: Metabolically unhealthy obese; MHO: Metabolically healthy obese; HOMA-IR: Homeostatic Model Assessment of Insulin Resistance; HDL-C: High-density lipoprotein cholesterol; LDL-C: Low-density lipoprotein cholesterol; HbA1C: Hemoglobin A1C.

**eTable 4. Clinical Characteristics of Participants With Metabolically Unhealthy Obesity (MUHO) vs Metabolically Healthy Obesity (MHO) and High-Sensitivity C-Reactive Protein (hs-CRP) Levels Greater Than 2 mg/dL**

| Clinical Parameter                 | MUHO (n=222) | MHO with >2 mg/dl hs-CRP (n=53) | P value |
|------------------------------------|--------------|---------------------------------|---------|
| Female, %                          | 77           | 89                              | 0.001   |
| Age, y                             | 45 (12)      | 36 (10)                         | <0.001  |
| Body Mass Index, kg/m <sup>2</sup> | 46 (8)       | 45 (6)                          | 0.233   |
| Waist circumference, cm            | 127 (17)     | 119 (16)                        | 0.002   |
| Weight, kg                         | 126 (26)     | 121 (20)                        | 0.123   |
| Glucose, mg/dl                     | 120 (57)     | 89 (7)                          | <0.001  |
| Insulin, $\mu$ U/ml                | 16 (8)       | 13 (7)                          | 0.003   |
| HOMA                               | 6.4 (7.6)    | 2.8 (1.5)                       | <0.001  |
| Triglycerides, mg/dl               | 131 (76)     | 90 (31)                         | <0.001  |
| Total Cholesterol, mg/dl           | 182 (42)     | 184 (34)                        | 0.727   |
| HDL-C, mg/dl                       | 46 (13)      | 48 (12)                         | 0.191   |
| LDL-C, mg/dl                       | 110 (33)     | 118 (31)                        | 0.106   |
| HbA1C, %                           | 6.5 (1.8)    | 5.3 (0.4)                       | <0.001  |
| hs-C Reactive Protein, mg/dl       | 10 (10)      | 11 (9)                          | 0.619   |
| Flow mediated dilation, %          | 8.4 (5.1)    | 12.6 (5.3)                      | <0.001  |
| Reactive Hyperemia, % change       | 695 (373)    | 868 (409)                       | 0.011   |

Descriptive statistics that are normally distributed are presented as mean with standard deviation (SD), and non-normally distributed data are presented as medians with interquartile ranges (IQRs). Abbreviations: MUHO: Metabolically unhealthy obese; MHO: Metabolically healthy obese; hs-CRP: High sensitivity C reactive protein; HOMA-IR: Homeostatic Model Assessment of Insulin Resistance; HDL-C: High-density lipoprotein cholesterol; LDL-C: Low-density lipoprotein cholesterol; HbA1C: Hemoglobin A1C.
